# Supplementary material
Source: PubMed Central journal article supplement (PMC3486241)
Supplement: JCM.00620-12_zjm999091996so1.pdf [file JCM.00620-12_zjm999091996so1.pdf]

SUPPL TABLE 1: Phenotypic and Genotypic Characteristics of Clinical PZA-R Isolates

| ISOLATE | pncA <sup>a</sup> | rpsA <sup>b</sup> | PHENOTYPE <sup>c</sup> |                     | GENOTYPE <sup>d</sup> |               |                 | PYRAZINAMIDASE/pncA MUTATIONS <sup>e</sup> |                                       | DRUG RESISTANCE <sup>f</sup> |     |    |     |    |    |     |     |     |
|---------|-------------------|-------------------|------------------------|---------------------|-----------------------|---------------|-----------------|--------------------------------------------|---------------------------------------|------------------------------|-----|----|-----|----|----|-----|-----|-----|
|         |                   |                   | 460TB                  | BT960               | MTBC LINEAGE          | MIRU-VNTR     | SPOLOGOTYPE     | NUCLEOTIDE CHANGE                          | AMINO ACID CHANGE                     | PZA                          | INH | RM | EMB | SM | AK | CAP | ETA | OFL |
| 1       | WT                | WT                | MDR                    | No Growth           | EAST ASIAN            | 222325173533  | 00000000003771  | WT                                         | WT                                    | R                            | R   | R  | S   | S  | S  | S   | R   | -   |
| 2       | WT                | WT <sup>4</sup>   | MDR                    | No Growth           | EAST ASIAN            | 223325153533  | 00000000003771  | WT                                         | WT                                    | R                            | R   | R  | S   | S  | S  | S   | R   | -   |
| 3       | WT                | WT <sup>4</sup>   | MDR                    | No Growth           | INDO OCEANIC          | 228225133433  | 77777777777771  | WT                                         | WT                                    | R                            | R   | R  | R   | S  | S  | S   | S   | R   |
| 4       | WT                | WT                | PZA Only               | PZA <sup>SENS</sup> | EURO AMERICAN         | 226325153323  | 77770007720771  | WT                                         | WT                                    | S                            | S   | S  | S   | S  | -  | -   | -   | -   |
| 5       | WT                | WT                | PZA Only               | PZA <sup>SENS</sup> | EAST AFRICAN INDIAN   | 224325153324  | 700076700000071 | WT                                         | WT                                    | S                            | S   | S  | S   | S  | -  | -   | -   | -   |
| 6       | WT                | WT <sup>4</sup>   | PZA Only               | PZA <sup>SENS</sup> | EAST ASIAN            | 223325173533  | 00000000003771  | WT                                         | WT                                    | S                            | S   | S  | S   | S  | -  | -   | -   | -   |
| 7       | WT <sup>2</sup>   | WT                | PZA Only               | PZA <sup>SENS</sup> | EAST AFRICAN INDIAN   | 236425163335  | 703777440003771 | WT; [C195T]                                | WT [Ser65Ser]                         | S                            | S   | S  | S   | S  | -  | -   | -   | -   |
| 8       | WT                | WT <sup>4</sup>   | POLY                   | PZA <sup>SENS</sup> | INDO OCEANIC          | 238225173333  | 77757777777771  | WT                                         | WT                                    | S                            | R   | S  | S   | R  | S  | S   | S   | S   |
| 9       | WT <sup>1</sup>   | WT                | PZA Only               | PZA Only            | EURO AMERICAN         | 223125143322  | 61777777760771  | WT                                         | WT                                    | R                            | S   | S  | S   | -  | -  | -   | -   | -   |
| 10      | NS <sup>1</sup>   | WT                | MDR                    | MDR                 | EURO AMERICAN         | 224325152325  | 77773677760771  | G538T                                      | Val180Phe                             | R                            | R   | R  | S   | S  | S  | S   | S   | S   |
| 11      | DEL <sup>1</sup>  | WT                | MDR                    | MDR                 | EURO AMERICAN         | 225125113324  | 770000017760771 | 1 bp deletion @ 260                        | Frameshift                            | R                            | R   | R  | R   | R  | S  | S   | S   | S   |
| 12      | PRO               | -                 | PZA Only               | -                   | EAST AFRICAN INDIAN   | 227723173533  | 703760000000331 | A(-11)G                                    | Promoter                              | R                            | S   | S  | S   | S  | -  | -   | -   | -   |
| 13      | PRO               | -                 | PZA Only               | -                   | INDO OCEANIC          | 254325223433  | 777637777413771 | G(-13)T                                    | Promoter                              | R                            | S   | S  | S   | -  | -  | -   | -   | -   |
| 14      | PRO               | -                 | POLY                   | -                   | EAST ASIAN            | 223315173634  | 00000000003771  | A(-11)G                                    | Promoter                              | R                            | R   | S  | R   | R  | S  | S   | R   | S   |
| 15      | NS                | -                 | PZA Only               | -                   | EURO AMERICAN         | 22426143321   | 77777760740771  | A573C                                      | Ser179Arg                             | R                            | S   | S  | S   | S  | -  | -   | -   | -   |
| 16      | NS                | -                 | PZA Only               | -                   | EURO AMERICAN         | 222325143323  | 57777777400731  | C161G                                      | Pro54Arg                              | R                            | S   | S  | S   | S  | -  | -   | -   | -   |
| 17      | NS                | -                 | PZA Only               | -                   | INDO OCEANIC          | 294326223512  | 763000000000031 | C174G                                      | Phe58Leu                              | R                            | S   | S  | S   | S  | -  | -   | -   | -   |
| 18      | NS                | -                 | PZA Only               | -                   | INDO OCEANIC          | 228225173433  | 77777777777771  | T269G                                      | Ile90Ser                              | R                            | S   | S  | S   | S  | -  | -   | -   | -   |
| 19      | NS                | -                 | PZA Only               | -                   | EAST ASIAN            | 223325173433  | 00000000003771  | G395A                                      | Gly132Asp                             | R                            | S   | S  | S   | S  | -  | -   | -   | -   |
| 20      | NS                | -                 | PZA Only               | -                   | INDO OCEANIC          | 274326223422  | 677777477413771 | A35C                                       | Asp12Ala                              | R                            | S   | S  | S   | S  | -  | -   | -   | -   |
| 21      | NS                | -                 | PZA Only               | -                   | EURO AMERICAN         | 224325143324  | 70007677760771  | A23G                                       | Asp8Gly                               | R                            | S   | S  | S   | -  | -  | -   | -   | -   |
| 22      | NS                | -                 | PZA Only               | -                   | INDO OCEANIC          | 254326223713  | 777777777413731 | G463A                                      | Val155Met                             | R                            | S   | S  | S   | -  | -  | -   | -   | -   |
| 23      | NS                | -                 | PZA Only               | -                   | EAST ASIAN            | 325525173533  | 00000000003771  | C217G                                      | His51Asp                              | R                            | S   | S  | S   | -  | -  | -   | -   | -   |
| 24      | NS                | -                 | PZA Only               | -                   | M. bovis              | 232324250222  | 67660177767600  | C169G                                      | His57Asp                              | R                            | S   | S  | S   | -  | -  | -   | -   | -   |
| 25      | NS                | -                 | PZA Only               | -                   | M. bovis BCG          | 2252324253322 | 67673777777600  | C169G; [C222T]                             | His57Asp; [Ser74Ser]                  | R                            | S   | S  | S   | -  | -  | -   | -   | -   |
| 26      | NS                | -                 | PZA Only               | -                   | M. bovis BCG          | 2252324253322 | 67673777777600  | C169G                                      | His57Asp                              | R                            | S   | S  | S   | -  | -  | -   | -   | -   |
| 27      | NS                | -                 | PZA Only               | -                   | M. bovis BCG          | 2252324223322 | 67673777777600  | C169G                                      | His57Asp                              | R                            | S   | S  | S   | -  | -  | -   | -   | -   |
| 28      | NS                | -                 | PZA Only               | -                   | M. bovis BCG          | 2252324253322 | 67673777777600  | C169G                                      | His57Asp                              | R                            | S   | S  | S   | -  | -  | -   | -   | -   |
| 29      | NS                | -                 | PZA Only               | -                   | M. bovis BCG          | 2252324253322 | 67673777777600  | C169G                                      | His57Asp                              | R                            | S   | S  | S   | -  | -  | -   | -   | -   |
| 30      | NS                | -                 | PZA Only               | -                   | M. bovis              | 232324253322  | 67673677777600  | C169G                                      | His57Asp                              | R                            | S   | S  | S   | -  | -  | -   | -   | -   |
| 31      | NS                | -                 | PZA Only               | -                   | M. bovis              | 232324253322  | 66673677777600  | C169G                                      | His57Asp                              | R                            | S   | S  | S   | -  | -  | -   | -   | -   |
| 32      | NS                | -                 | PZA Only               | -                   | M. bovis BCG          | 2152324253322 | 67673777777600  | C169G                                      | His57Asp                              | R                            | S   | S  | S   | -  | -  | -   | -   | -   |
| 33      | NS                | -                 | POLY                   | -                   | M. bovis              | 232324251222  | 67673777777600  | C169G                                      | His57Asp                              | R                            | S   | S  | S   | S  | S  | S   | S   | S   |
| 34      | NS                | -                 | POLY                   | -                   | M. bovis              | 23224123422   | 66403777777600  | C169G                                      | His57Asp                              | R                            | S   | S  | S   | S  | S  | S   | S   | S   |
| 35      | NS                | -                 | POLY                   | -                   | EAST ASIAN            | 223325173533  | 00000000003771  | A226C                                      | Thr76Pro                              | R                            | R   | S  | R   | R  | S  | S   | -   | S   |
| 36      | NS                | -                 | POLY                   | -                   | EAST ASIAN            | 223325153533  | 00000000003371  | A152G                                      | His51Arg                              | R                            | R   | S  | R   | S  | S  | R   | S   | R   |
| 37      | NS                | -                 | POLY                   | -                   | EAST ASIAN            | 223325153533  | 00000000003371  | A152G                                      | His51Arg                              | R                            | R   | S  | R   | S  | S  | R   | S   | R   |
| 38      | NS                | -                 | MDR                    | -                   | EAST ASIAN            | 203325183533  | 00000000003371  | A226C                                      | Thr76Pro                              | R                            | R   | S  | R   | S  | S  | R   | S   | R   |
| 39      | NS                | -                 | MDR                    | -                   | INDO OCEANIC          | 254326223432  | 677777477413471 | C211T                                      | His71Tyr                              | R                            | R   | R  | S   | S  | S  | R   | S   | R   |
| 40      | NS                | -                 | MDR                    | -                   | INDO OCEANIC          | 254326223432  | 677777477413471 | T307T                                      | Tyr103Asp                             | R                            | R   | R  | S   | S  | S  | R   | S   | R   |
| 41      | NS                | -                 | MDR                    | -                   | EURO AMERICAN         | 223125153322  | 77773777760771  | G463A                                      | Val155Met                             | R                            | R   | R  | R   | S  | S  | R   | S   | R   |
| 42      | NS                | -                 | MDR                    | -                   | EAST ASIAN            | 222325183523  | 00000000002771  | T199C                                      | Ser67Pro                              | R                            | R   | R  | R   | S  | S  | R   | S   | R   |
| 43      | NS                | -                 | MDR                    | -                   | EURO AMERICAN         | 223226153321  | 67777760760771  | T254A                                      | Leu85Gln                              | R                            | R   | R  | R   | -  | -  | -   | -   | -   |
| 44      | NS                | -                 | MDR                    | -                   | EURO AMERICAN         | 223226153321  | 67777760760771  | T254A                                      | Leu85Gln                              | R                            | R   | R  | R   | S  | S  | S   | S   | R   |
| 45      | NS                | -                 | MDR                    | -                   | EAST ASIAN            | 223315173533  | 00000000003771  | A170G                                      | His57Arg                              | R                            | R   | R  | R   | S  | S  | R   | S   | R   |
| 46      | NS                | -                 | MDR                    | -                   | EAST ASIAN            | 223315173534  | 00000000003771  | A226C                                      | Thr76Pro                              | R                            | R   | R  | R   | S  | S  | S   | S   | R   |
| 47      | NS                | -                 | MDR                    | -                   | EURO AMERICAN         | 223325143323  | 77773777760401  | C137T                                      | Ala46Val                              | R                            | R   | R  | R   | S  | S  | R   | S   | R   |
| 48      | NS <sup>2</sup>   | -                 | MDR                    | -                   | EAST AFRICAN INDIAN   | 226425173523  | 703777440003771 | T11G; [C195T]                              | Leu4Trp; [Ser65Ser]                   | R                            | R   | R  | R   | S  | S  | S   | S   | -   |
| 49      | NS                | -                 | MDR                    | -                   | INDO OCEANIC          | 254326223432  | 677777477413771 | C263A                                      | Nonsense                              | R                            | R   | R  | R   | R  | R  | R   | S   | S   |
| 50      | NS                | -                 | MDR                    | -                   | EAST ASIAN            | 223325163533  | 00000000003771  | A188G                                      | Asp63Gly                              | R                            | R   | R  | R   | S  | S  | S   | S   | S   |
| 51      | NS                | -                 | MDR                    | -                   | EAST ASIAN            | 223325173533  | 00000000003771  | C512T                                      | Ala171Val                             | R                            | R   | R  | R   | S  | S  | R   | S   | R   |
| 52      | NS <sup>2</sup>   | -                 | MDR                    | -                   | EAST AFRICAN INDIAN   | 225425133533  | 303777440003671 | A422C; [C195T]                             | Gln141Pro; [Ser65Ser]                 | R                            | R   | R  | R   | S  | S  | S   | S   | S   |
| 53      | NS                | -                 | MDR                    | -                   | EAST ASIAN            | 2233-5153532  | 00000000003771  | T452C                                      | Leu151Ser                             | R                            | R   | R  | R   | S  | S  | R   | S   | R   |
| 54      | NS                | -                 | XDR                    | -                   | EURO AMERICAN         | 124226154222  | 77774077560771  | A152G                                      | His51Arg                              | R                            | R   | R  | R   | S  | S  | R   | R   | R   |
| 55      | INS               | -                 | POLY                   | -                   | EAST ASIAN            | 322325173543  | 00000000003771  | 1 bp insert G @ 339                        | Frameshift (after Gly113)             | R                            | R   | S  | R   | S  | S  | S   | S   | R   |
| 56      | INS               | -                 | POLY                   | -                   | EAST ASIAN            | 223325173433  | 00000000003771  | 9 bp insertion: ATGTGGTCC @ 395            | In Frame Insertion: Asp-Val-Val @ 132 | R                            | R   | S  | R   | S  | S  | S   | S   | R   |
| 57      | INS               | -                 | MDR                    | -                   | EAST AFRICAN INDIAN   | 223425173533  | 70377770003771  | 1 bp insertion G @ 408; [C195T]            | Frameshift; [Ser65Ser]                | R                            | R   | S  | S   | S  | S  | S   | S   | S   |
| 58      | INS <sup>2</sup>  | -                 | MDR                    | -                   | EAST AFRICAN INDIAN   | 226425163532  | 703777440003171 | 1 bp insertion G @ 391; [C195T]            | Frameshift; [Ser65Ser]                | R                            | R   | R  | R   | S  | S  | R   | S   | R   |
| 59      | INS               | -                 | MDR                    | -                   | EURO AMERICAN         | 224226163321  | 67773760760771  | 2 bp insertion GG @ 392                    | Frameshift                            | R                            | R   | R  | R   | S  | S  | R   | S   | R   |
| 60      | INS               | -                 | MDR                    | -                   | EURO AMERICAN         | 223226153323  | 777737777000371 | 1 bp insertion A @ 408                     | Frameshift                            | R                            | R   | R  | S   | S  | S  | S   | S   | R   |
| 61      | DEL <sup>1</sup>  | -                 | PZA Only               | -                   | EURO AMERICAN         | 253325153324  | 77637777760731  | C418A; 8 bp deletion @ 446                 | Arg140Ser; Frameshift                 | R                            | S   | S  | S   | S  | -  | -   | -   | -   |
| 62      | DEL <sup>1</sup>  | -                 | PZA Only               | -                   | EURO AMERICAN         | 233325163324  | 77637777760771  | C418A; 8 bp deletion @ 446                 | Arg140Ser; Frameshift                 | R                            | S   | S  | S   | -  | -  | -   | -   | -   |
| 63      | DEL <sup>1</sup>  | -                 | PZA Only               | -                   | EURO AMERICAN         | 253325153324  | 77637777760731  | C418A; 8 bp deletion @ 446                 | Arg140Ser; Frameshift                 | R                            | S   | S  | S   | -  | -  | -   | -   | -   |
| 64      | DEL <sup>4</sup>  | -                 | MDR                    | -                   | EAST AFRICAN INDIAN   | 124226154222  | 700377740003771 | 2 bp deletion @ 282; [C195T]               | Frameshift; [Ser65Ser]                | R                            | R   | R  | R   | S  | S  | S   | S   | S   |

a WT = wild type pncA; PRO = promoter mutation; NS = nonsynonymous mutation; INS = mutation due to insertion, DEL = mutation due to deletion; 1 = target resequenced; 2 = sequence includes the synonymous mutation C195T; 3 = 'Quebec' mutation

b WT = wild type rpsA; 4 = sequence includes the synonymous mutation A636C

c Resistance phenotype as determined with the BACTEC 460 system (all isolates) and MGIT 960 platform (11 discordant isolates)

PZA Only = pyrazinamide mono-resistant; POLY = resistant to at least pyrazinamide and isoniazid; MDR = resistant to at least pyrazinamide, isoniazid and rifampin; XDR = extremely drug resistant

d Lineage designations were assigned using a combination of 12 loci MIRU-VNTR and Spoligotyping Data and using the Gagneux Nomenclature. MIRU-VNTRplus [1] and SPOL DB4 [2] were used to assist lineage assignments.

[1] Allix-Béguec C., D. Harmsen, T. Weniger, P. Supply, S. Niemann. 2008. Evaluation and user-strategy of MIRU-VNTRplus, a multifunctional database for online analysis of genotyping data and phylogenetic identification of *M. tuberculosis* complex isolates. *J Clin Microbiol.* 46:2692-2699.

[2] Brudley K., J.R. Driscoll, L Rigouts et al.2006. Mycobacterium tuberculosis complex genetic diversity : mining the fourth international spoligotyping database (SpolDB4) for classification, population genetics and epidemiology. *BMC Microbiol.*6:23

e WT = wild type; square brackets designate synonymous mutations

f R = resistant; S = sensitive; - = not tested

First line drugs are: PZA = pyrazinamide; INH = isoniazid; RIF = rifampin; EMB = ethambutol

Second Line drugs are: SM = streptomycin; AK = amikacin; CAP = capreomycin; ETA = ethionamide; OFL = ofloxacin; PAS = p-aminosalicylic acid
